# Supplementary material
Source: PubMed Central journal article supplement (PMC4826004)
Supplement: supp_tpc.15.00608_TPC2015-00608-RAR1_Supplemental_Data.pdf [file supp_tpc.15.00608_TPC2015-00608-RAR1_Supplemental_Data.pdf]

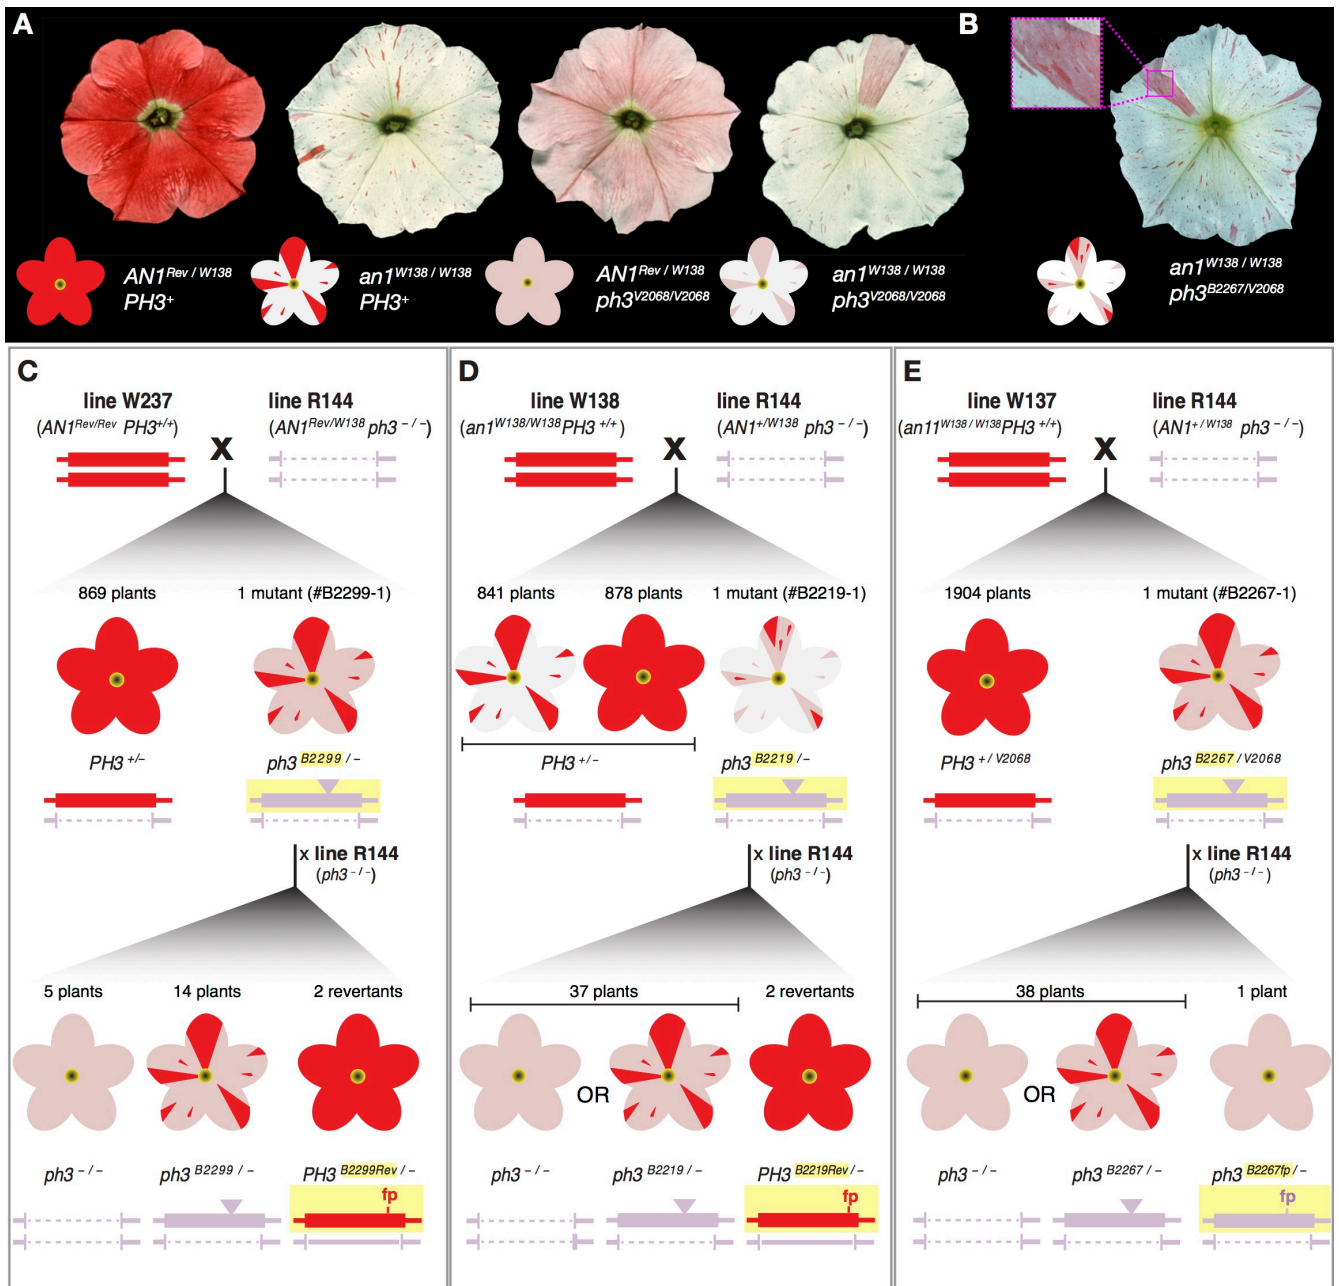

**Supplemental Figure 1.** Isolation and genetic characterization of  $ph3$  mutants.

(A) Images and diagrams of flower phenotypes in family V2068 segregating for the mutable  $an1^{W138}$  allele (indicated here as  $an1^m$ ) and a derived revertant allele ( $AN1^{REV}$ ) as well as a wild type  $PH3^+$  and the stable recessive  $ph3^{V2068}$  allele (indicated here as  $ph3$ ). Note that colored petal cells ( $AN1^{REV}$ ) acquire either a red or a purplish color depending on the  $ph3$  genotype.

(B) Flower and diagrammatic representation of a transposon tagged mutant (plant B2267-1) with an unstable  $an1$  ( $an1^{W138/W138}$ ) and  $ph3$  ( $ph3^{B2267/V2068}$ ) phenotype. The enlarged rectangle shows a detail of a purplish ( $ph3$ ) sector with red  $PH3^{REV}$  spots.

(C-E) Pedigrees showing the origin of  $ph3^{B2299}$  (C),  $ph3^{B2219}$  (D) and  $ph3^{B2267}$  (E) and progeny from test crosses. Floral phenotypes are indicated by diagrams as in (A); the structure of the  $PH3$  locus is shown below. The active  $PH3$  allele is shown in red, mutant  $ph3$  alleles with a transposon insertion (triangle) or deletion (dashed line) are shown in purplish. For each generation newly arisen  $ph3$  or  $PH3^{REV}$  alleles are highlighted with yellow background.

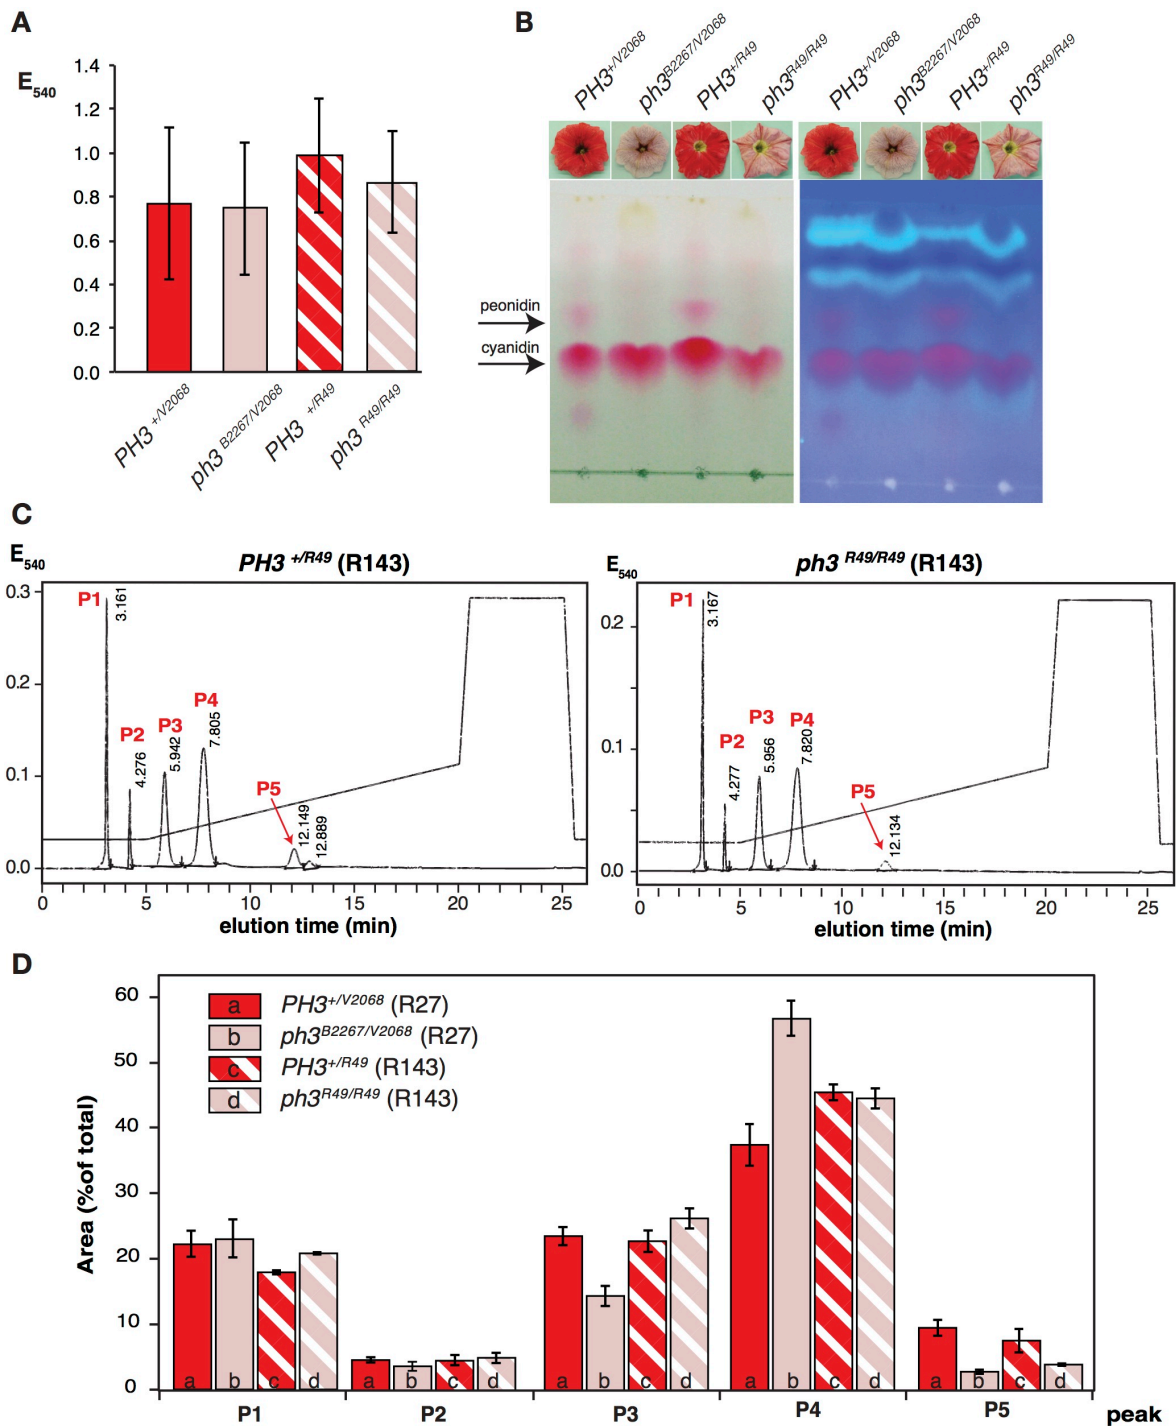

**Supplemental Figure 2.** Anthocyanin content of *PH3* and *ph3* petals.

(A) Total anthocyanin content (E<sub>540</sub>) of flowers with different genotypes (n=5, mean±SD).

(B) TLC analysis of anthocyanidins obtained by acid hydrolysis of anthocyanins from flowers with different genotypes. The TLC plates were photographed under white light (left) and UV light (right)

(C) Representative HPLC profiles of anthocyanins in *PH3*<sup>+</sup> and *ph3* mutant flowers. P1-P5 indicate numbers of anthocyanin peaks

(D) Quantification (mean ± SD) of different anthocyanins (expressed as % of total amount anthocyanins) as determined from the area of peaks 1 to 5 (P1-P5) in HPLC profiles from different flowers (n=5).

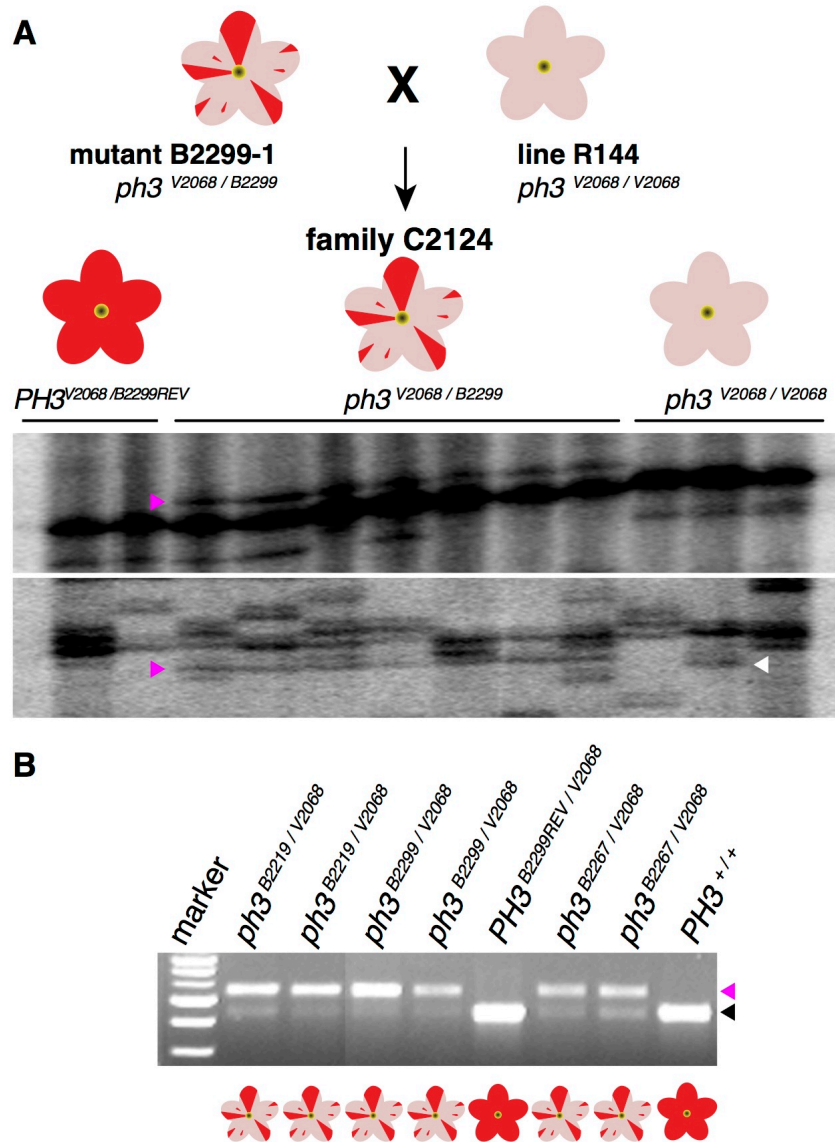

**Supplemental Figure 3.** Identification of the *PH3* gene.

**(A)** Identification of *dTPH1* flanking sequences originating from *PH3* by transposon display. The origin, phenotypes and inferred genotypes of the analyzed plants from family C2124 are indicated by the flower diagrams (*cf.* Supplemental Figure 1C). The gel images are sections from two transposon-display gels showing amplification products obtained with the adaptors *Bfal*+*T* (top) or *TaqI*+*G* (bottom). Magenta arrowheads mark two specific *dTPH1* flanking sequences seen in seven unstable  $ph3^{V2068/B2299}$  mutants, but not in siblings with a stable recessive ( $ph3^{V2068/V2068}$ ) phenotype or two germinal revertants ( $PH3^{V2068/B2299REV}$ ). The white arrowhead marks an unrelated fragment that is 1 nucleotide shorter.

**(B)** PCR amplification of the genomic region identified in (A) from the three tagged mutants heterozygous for  $ph3^{B2219}$ ,  $ph^{B2289}$  or  $ph3^{B2267}$  and the stable  $ph3^{V2068}$  allele, a derived revertant ( $PH3^{B2299REV}$ ) and the  $PH3^{+/+}$  progenitor line W138. Note that plants with an unstable *ph3* phenotype (purplish flowers with red spots) yield besides amplification productions containing *dTPH1* (magenta arrowhead) a small amount of products with a wild type size (black arrowhead) that result from somatic *dTPH1* excisions. The  $ph3^{V2068}$  allele yields no PCR products at all.

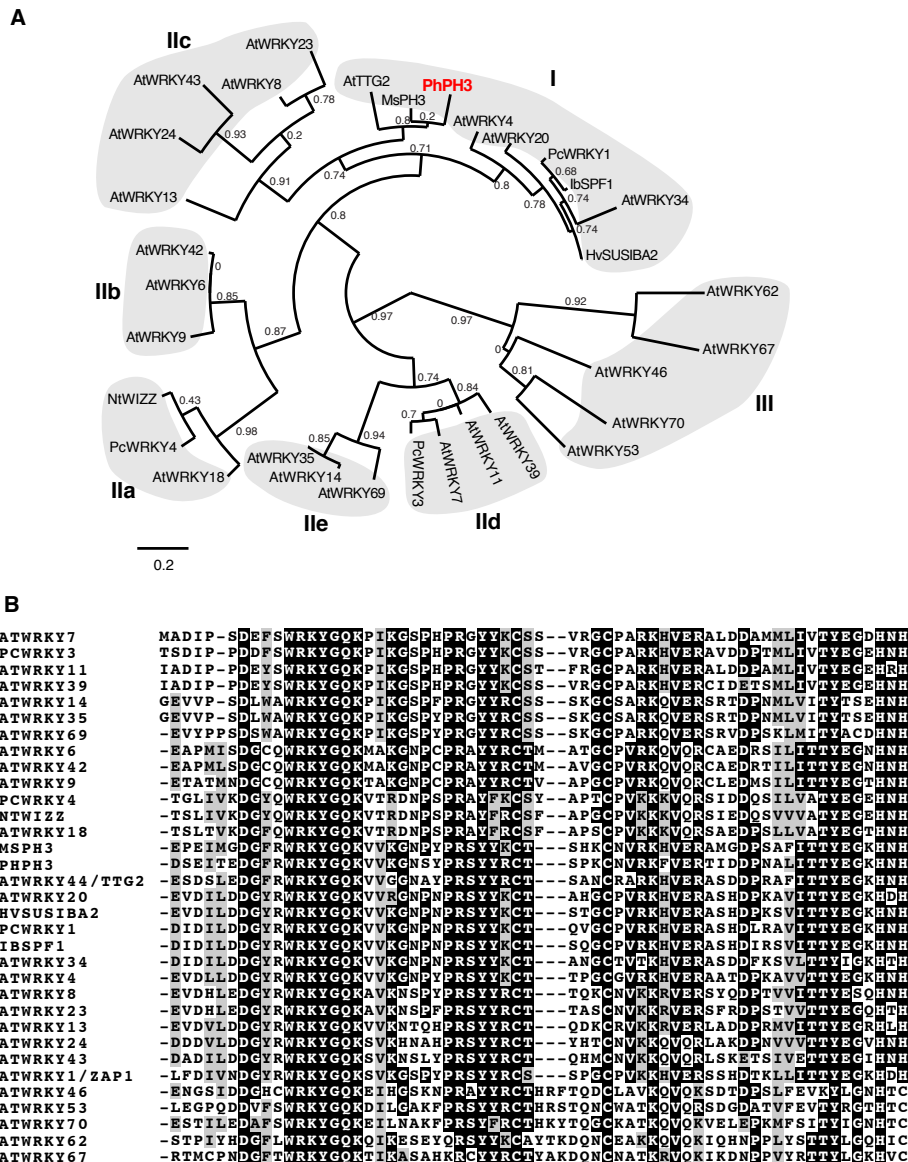

**Supplemental Figure 4.** PH3 is a type I WRKY protein with similarity to Arabidopsis TTG2.  
**(A)** Phylogenetic tree of a selection of WRKY proteins, representing all main branches of the family (cf. Eulgem et al., 2000). The tree is based on the alignment of sequences spanning the C-terminal WRKY domain and 10 upstream amino acids shown in B. Prefixes denote the species of origin: *Arabidopsis thaliana* (At), parsley (*Petroselinum crispum*, Pc), *Nicotiana tabacum* (Nt), barley (*Hordeum vulgare*, Hv) and sweet potato (*Ipomea batatas*, Ib).  
**(B)** Alignment of the PH3 and TTG2 protein sequence fragments used to generate the phylogenetic tree shown in (A). Black shading denotes sequence identity, grey shading similarity.

Eulgem, T., Rushton, P.J., Robatzek, S., and Somssich, I.E. (2000). The WRKY superfamily of plant transcription factors. Trends Plant Sci 5, 199-206



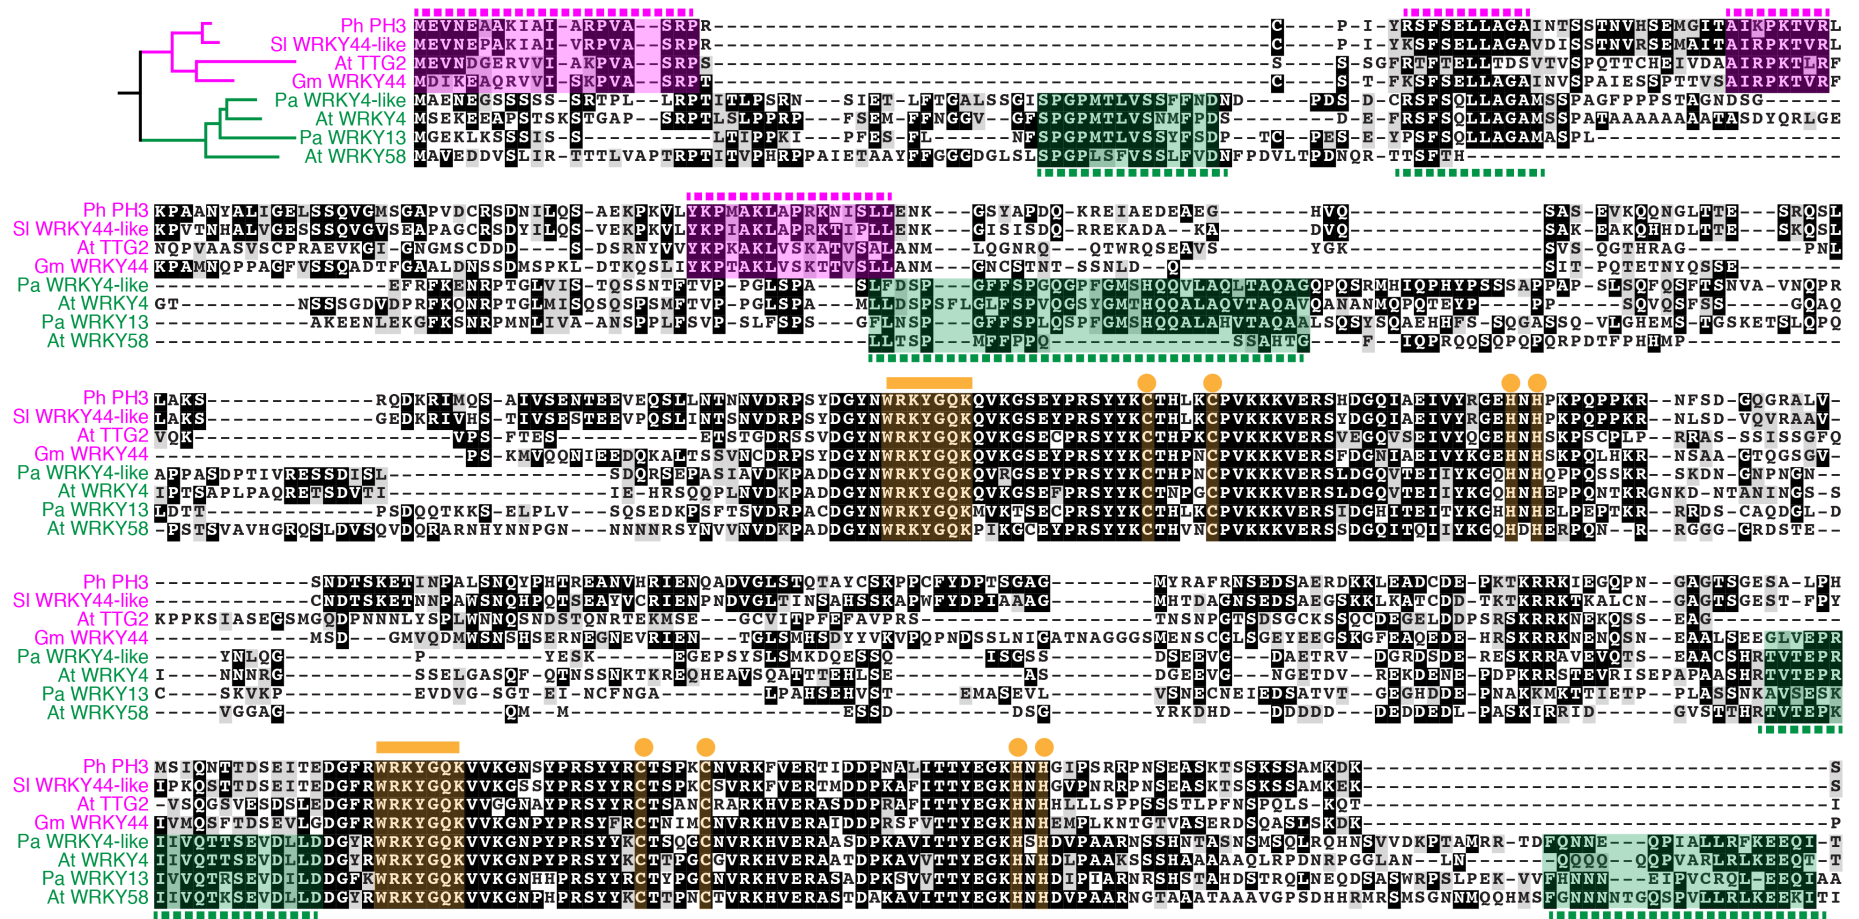

Supplemental Figure 5. Alignment of PH3 with homologs from other species and closely related WRKY proteins.

Alignment of PH3 protein to TIG2 and homologs from soybean (*Glycine max*, Gm) and tomato (*Solanum lycopersicum*, SI) (names in magenta) and the next most similar proteins (names in green) from *Petunia axillaris* (Pa) and *Arabidopsis* (At). The conserved WRKY motif and C2H2 finger are marked by ochre stripes and dots above the sequence. Dashed lines above and below the sequences denote several regions conserved within the magenta and green group. Black shading denotes sequence identity, grey shading similarity.

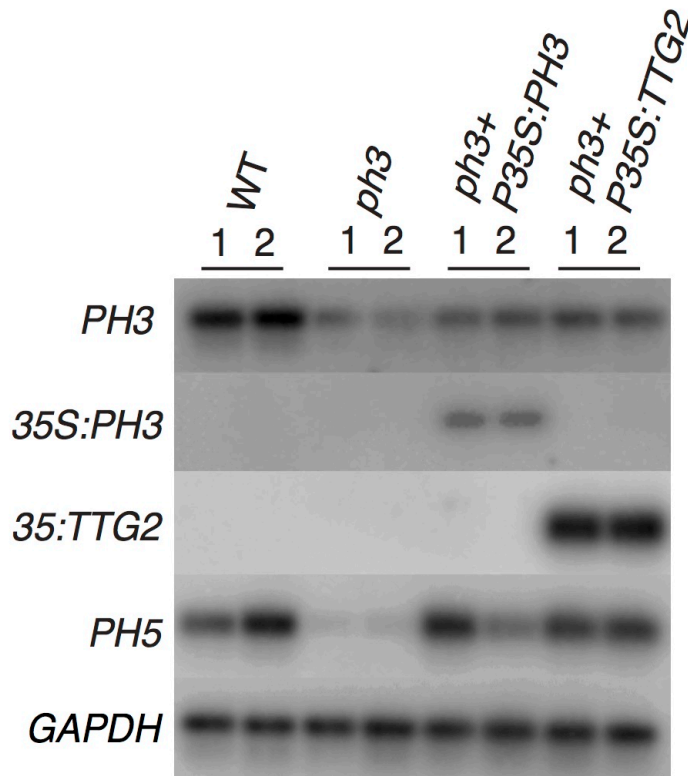

**Supplemental Figure 6.** Expression *p35S:PH3* and *p35S:TTG2* transgenes rescues *PH5* mRNA expression in *ph3* mutants.

RT-PCR analysis of the expression of the *PH3* endogene, *p35S:PH3*, *p35S:TTG2* and the downstream gene *PH5* in four transgenic lines with red flowers (cf. Figure 5). *GAPDH* expression is shown as an internal control. RNAs were amplified using gene-specific primers and a reduced number of cycles and amplification products were after electrophoresis detected by blot hybridization.

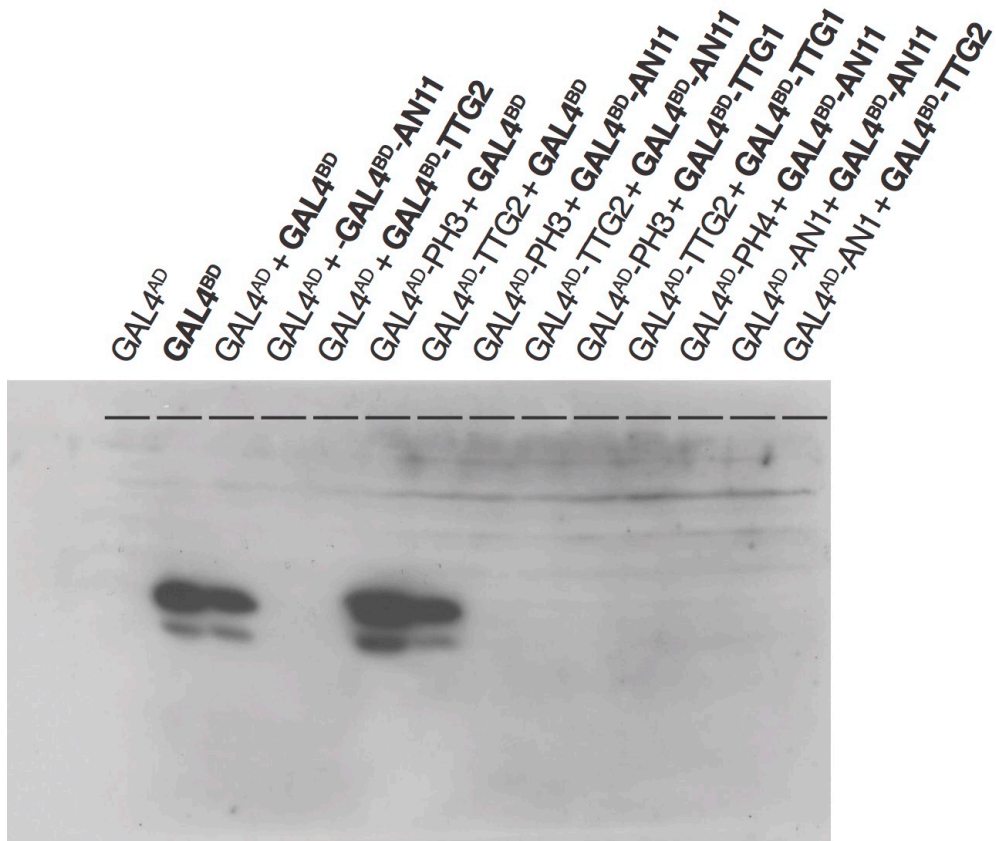

**Supplemental Figure 7.** Immuno-blot analysis of yeast two hybrid strains. Proteins from yeast strains expressing the indicated GAL4 fusion proteins were detected with anti-Gal4<sup>BD</sup> serum.

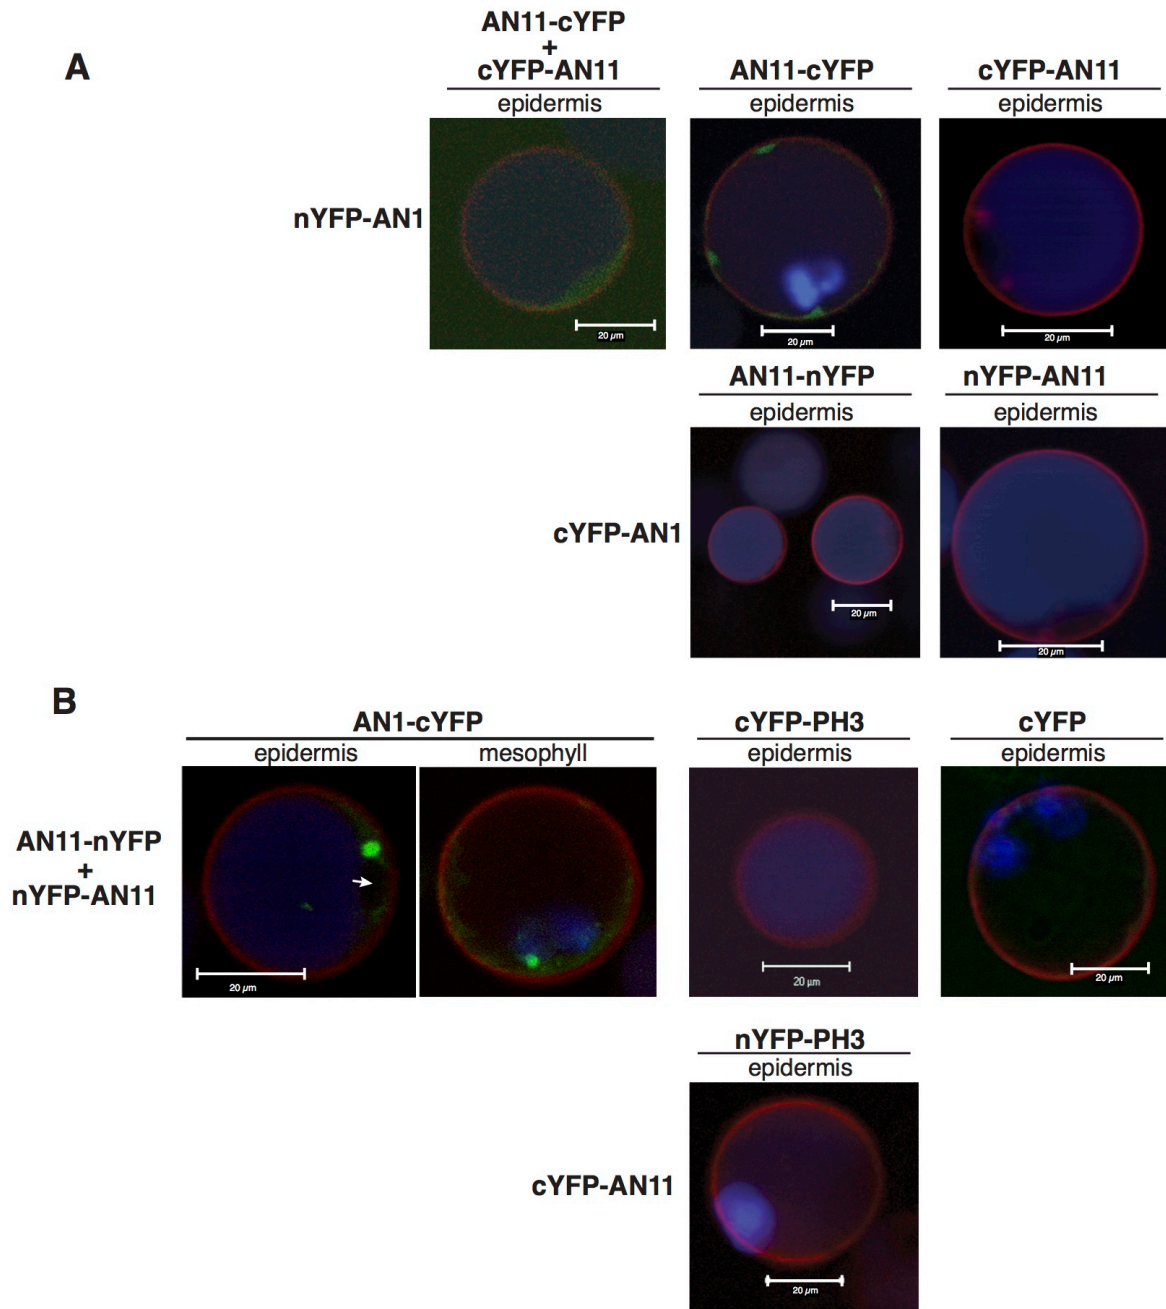

**Supplemental Figure 8.** Interaction of AN1 and AN11 in petunia petal protoplasts.

(A) Protoplast from petal epidermis expressing AN11-cYFP and c-YFP-AN11 in combination with nYFP-AN1.

(B) Petal protoplasts from epidermis and mesophyll expressing AN11-nYFP and nYFP-AN11 in combination with AN1-cYFP or cYFP.

Restored YFP fluorescence (BiFC) is shown in green. Fluorescence of the plasma membrane protein RFP-SYP122, which was used as a transformation marker, is shown in red and fluorescence of anthocyanins in dark blue. The white arrows point into the nucleus. Size bars, 20 μm.



## Supplemental Data. Verweij et al. Plant Cell (2016) 10.1105/tpc 115.00608

**Supplemental Table 1: Inbred petunia lines and genotypes used.**

| line | background      | relevant genotype                   |                        |                                    | reference |
|------|-----------------|-------------------------------------|------------------------|------------------------------------|-----------|
|      |                 | regulatory AN genes                 | structural genes       | PH genes                           |           |
| R27  | R27             | <i>AN1 an4 AN11</i>                 | <i>AN10 hf1 hf2 rt</i> | <i>PH2 PH3 PH4</i>                 | a,b,e     |
| W134 | R27             | <i>AN1 an4 an11<sup>W134</sup></i>  | <i>AN10 hf1 hf2 rt</i> | <i>PH2 PH3 PH4</i>                 | a         |
| W137 | R27             | <i>AN1 an4 an11<sup>W137</sup></i>  | <i>AN10 hf1 hf2 rt</i> | <i>PH2 PH3 PH4</i>                 | a         |
| W138 | R27             | <i>an1<sup>W138</sup> an4 AN11</i>  | <i>AN10 hf1 hf2 rt</i> | <i>PH2 PH3 PH4</i>                 | b         |
| W225 | R27             | <i>an1<sup>V2015</sup> an4 AN11</i> | <i>AN10 hf1 hf2 rt</i> | <i>PH2 PH3 PH4</i>                 | b         |
| W237 | R27             | <i>an1<sup>W138</sup> an4 AN11</i>  | <i>an10 hf1 hf2 rt</i> | <i>PH2 PH3 PH4</i>                 | c         |
| R143 | [(R49xR3)xM1]xS | <i>AN1 an4 AN11</i>                 | <i>AN10 hf1 hf2 rt</i> | <i>PH2 ph3<sup>R49</sup> PH4</i>   | d,f       |
| R144 | R27             | <i>AN1 an4 AN11</i>                 | <i>AN10 hf1 hf2 rt</i> | <i>PH2 ph3<sup>V2068</sup> PH4</i> | e         |
| R149 | R27             | <i>AN1 an4 AN11</i>                 | <i>AN10 hf1 hf2 rt</i> | <i>PH2 PH3 ph4<sup>V2153</sup></i> | e         |
| R160 | R27             | <i>AN1 an4 AN11</i>                 | <i>AN10 hf1 hf2 rt</i> | <i>ph2 PH3 PH4</i>                 | e         |

<sup>1</sup> a, de Vetten et al., 1999; b, Spelt et al., 2000; c, van Houwelingen et al., 1998; d, de Vlaming et al., 1983; e, Quattrocchio et al., 2006, f, this paper

**Supplemental Table 2: AN1 and PH3 alleles used.**

| allele                       | background      | lesion                                                                                            | phenotype if homozygous in R27 background | reference <sup>1</sup> |
|------------------------------|-----------------|---------------------------------------------------------------------------------------------------|-------------------------------------------|------------------------|
| <i>AN1</i>                   | R27             | none, functional allele                                                                           | red petals, low pH                        | b                      |
| <i>an1<sup>W138</sup></i>    | R27             | highly unstable <i>dTPH1</i> insertion allele                                                     | white petals with red spots, high pH      | b                      |
| <i>an1<sup>V2015</sup></i>   | R27             | null allele with footprint derived by excision of <i>dTPH1</i> from <i>an1<sup>W138</sup></i>     | white petals, high pH                     | b                      |
| <i>AN11</i>                  | R27             | none, functional allele                                                                           | red petals, low pH                        | a                      |
| <i>an11<sup>W137</sup></i>   | R27             | unstable <i>dTPH1</i> insertion allele                                                            | white petals with red spots, high pH      | a                      |
| <i>an11<sup>W134</sup></i>   | R27             | stable <i>dTPH1</i> excision allele with footprint derived from <i>an1<sup>W137</sup></i>         | white petals, high pH                     | a                      |
| <i>PH3</i>                   | R27             | none, functional allele                                                                           | red petals, low pH                        | f                      |
| <i>ph3<sup>V2068</sup></i>   | R27             | (nearly) complete deletion                                                                        | purplish petals, high pH,                 | e,f                    |
| <i>ph3<sup>B2267</sup></i>   | R27             | weakly unstable <i>dTPH1</i> insertion                                                            | purplish petals with red spots, high pH   | f                      |
| <i>ph3<sup>B2219</sup></i>   | R27             | weakly unstable <i>dTPH1</i> insertion                                                            | purplish petals with red spots, high pH   | f                      |
| <i>ph3<sup>B2299</sup></i>   | R27             | weakly unstable <i>dTPH1</i> insertion                                                            | purplish petals with red spots, high pH   | f                      |
| <i>ph3<sup>B2267FP</sup></i> | R27             | stable <i>dTPH1</i> excision allele derived from <i>ph3<sup>B2267</sup></i> with a 7 bp footprint | purplish petals, high pH                  | f                      |
| <i>ph3<sup>R49</sup></i>     | [(R49xR3)xM1]xS | (nearly) complete deletion                                                                        | purplish petals, high pH                  | d,f                    |
| <i>PH4</i>                   | R27             | none, functional allele                                                                           | red petals, low pH                        | e                      |
| <i>ph4<sup>V2153</sup></i>   | R27             | stable <i>dTPH6</i> insertion                                                                     | purplish petals, high pH                  | e                      |

<sup>1</sup> a, de Vetten et al., 1999; b, Spelt et al., 2000; c, van Houwelingen et al., 1998; d, de Vlaming et al., 1983; e, Quattrocchio et al., 2006, f, this paper

**Supplemental Table 3:** Primers used for transposon display.

| primer  | name                    | sequence 5'-3'            |
|---------|-------------------------|---------------------------|
| 1115    | TaqI-Adapter1           | GACGATGAGTCCTGAG          |
| 1116    | TaqI-Adapter2           | CGCTCAGGACTCAT            |
| 1118-21 | TaqI+N                  | CGATGAGTCCTGAGCGAA+N      |
| 701     | Bfal-Adapter1           | GACGATGAGTCCTGAG          |
| 702     | Bfal-Adapter2           | TACTCAGGACTCAT            |
| 1123-26 | Bfal+N                  | ACGATGAGTCCTGAGTAGA+N     |
| 423     | out 11 ( <i>dTPH1</i> ) | CGAAGGGGTGTCAATGCTG       |
| 15      | out 5 ( <i>dTPH1</i> )  | CCCTTATTAGAATTCYTGGCTCCGC |
| 630     | out12 ( <i>dTPH1</i> )  | CAGCATTGACACCCCTTC        |
| 631     | out 13 ( <i>dTPH1</i> ) | CAGTGTAATTTTGCACAAA       |

Oligonucleotides TaqI-Adapter1 and TaqI-Adapter2 were annealed to generate the double stranded TaqI adapters and Bfal-Adapters and Bfal-Adapter2 to generate the double stranded Bfal adapters. Out11 (nested is out5) and out12 (nested is out13) are *dTPH1*-specific primers used in transposon display.

**Supplemental Table 4:** Primer used for RACE amplification of full length *PH3* cDNA.

| primer | gene       | sequence 5'-3'            | orientation |
|--------|------------|---------------------------|-------------|
| 1209   | <i>PH3</i> | TACCACTGACTCTGAAATTACTGAG | forw        |
| 1269   | <i>PH3</i> | GGGCGAGCACTTGTAAAGCAAT    | forw        |
| 1254   | <i>PH3</i> | CCTGATGTACCTGCTCCATTG     | rev         |
| 1297   | <i>PH3</i> | CAGGGCATTCGAAATTCGAAG     | rev         |
| 1296   | <i>PH3</i> | CATCATAACTAGGGCGATCGAC    | rev         |

**Supplemental Table 5:** Primer number and sequence used for real time RT-PCR

| primer | gene            | sequence 5'-3'              | orientation |
|--------|-----------------|-----------------------------|-------------|
| 6035   | <i>PH3endo</i>  | GGAAATGGAATTCATGGGAGC       | forward     |
| 2378   | <i>PH3endo</i>  | CTGTAAATAGGACATCTAGGCC      | reverse     |
| 6036   | <i>35S:PH3</i>  | GCTGACAAGCTGACTCTAGC        | forward     |
| 2378   | <i>35S:PH3</i>  | CTGTAAATAGGACATCTAGGCC      | reverse     |
| 6036   | <i>35S:TTG2</i> | GCTGACAAGCTGACTCTAGC        | forward     |
| 6037   | <i>35S:TTG2</i> | CGGTAAGTGAATCAGTAAGAAGC     | reverse     |
| 1060   | <i>PH4</i>      | CAATGGCTTTGTGAGTTCTAGGATC   | forward     |
| 1061   | <i>PH4</i>      | CGCCTCCATCGTCTCCTTGG        | reverse     |
| 5641   | <i>PH5</i>      | TAGCAATCCTAAATGATGGCACT     | forward     |
| 5642   | <i>PH5</i>      | CAACTATCAGGTCTTGAGATGG      | reverse     |
| 4900   | <i>DFR</i>      | ACCTATGGATTTTCGAGTCCAAAGA   | forward     |
| 4901   | <i>DFR</i>      | CACATGATTCAATGATGCTTAGCAT   | reverse     |
| 5643   | <i>AN1</i>      | TAGAGCCAATCAGACGGAGGCTAC    | forward     |
| 5644   | <i>AN1</i>      | CCCTTCCTTGCAACACCTTCAC      | reverse     |
| 3622   | <i>AN11</i>     | ATGGGATTGATCCCATGTCTGA      | forward     |
| 3559   | <i>AN11</i>     | TACTTTAAGCAATTGCAACTTGTAGAA | reverse     |
| 5922   | <i>Actin11</i>  | TGCACTCCACATGCTATCCT        | forward     |
| 5923   | <i>Actin11</i>  | TCAGCCGAAGTGGTGAAAGAG       | reverse     |

**Supplemental Table 6:** Primers and number of cycles used for RT-PCR analysis.

| primer | gene         | sequence 5'-3'                | orientation | cycles           |
|--------|--------------|-------------------------------|-------------|------------------|
| 19     | <i>GAPDH</i> | CTGGTTATTCCATTACAACCTAC       | reverse     | 20x              |
| 20     | <i>GAPDH</i> | GGTCGTTTGGTTGCAAGAGT          | forward     |                  |
| 126    | <i>AN1</i>   | TAGGATCCAGCCTTATCTGAGCACT     | forward     | 24 x             |
| 123    | <i>AN1</i>   | GGGAATTCCTATGGTGTCCCAAG       | reverse     |                  |
| 1269   | <i>PH3</i>   | GGGCGAGCACTTGTAAGCAAT         | forward     | 24 x             |
| 1254   | <i>PH3</i>   | CCTGATGTACCTGCTCCATTG         | reverse     |                  |
| 1317   | <i>PH4</i>   | TTCTCTAGAGATGAGAACCCCATCATCAT | forward     | 24 x             |
| 1233   | <i>PH4</i>   | AAGCTTTCTCTAACTGGGATTATATTGA  | reverse     |                  |
| 1812   | <i>PH5</i>   | GGAATCAATGTAAGTGATTGCAGTCCG   | forward     | 22x              |
| 1849   | <i>PH5</i>   | CGGAATACCAATAGCTATGCCAAC      | reverse     |                  |
| 27     | <i>35S</i>   | AGAAGACGTTCCAACCACGTCT        | forward     | 30x <sup>1</sup> |
| 2230   | <i>PH3</i>   | GATTTTGCTAAGAGACTTTGCC        | reverse     | 30x <sup>1</sup> |
| 2118   | <i>TTG2</i>  | CTTCTCGTTCTTCCTTCTTTTGCTTC    | reverse     | 30x <sup>1</sup> |

<sup>1</sup> primers 27, 2230 and 2118 were used to assay expression of *35S:PH3* and *35S:TTG2*

**Supplemental Data. Verweij et al. Plant Cell (2016) 10.1105/tpc 115.00608**

**Supplemental Table 7:** Primers used to generate templates for synthesis of RNA probes.

| primer              | gene       | Sequence <sup>1</sup>        | orientation |
|---------------------|------------|------------------------------|-------------|
| T7 promoter primer  | pGEM-Teasy | GTAATACGACTCACTATAGGG        | n.a.        |
| SP6 promoter primer | pGEM-Teasy | CTATTTAGGTGACACTATAG         | n.a.        |
| 3421                | <i>PH3</i> | ATGGAGGTCAATGAAGCAGCGAAAATAG | forward     |
| 1136                | <i>PH4</i> | ATGAGAACCCCATCATCATC         | forward     |
| 0097                | <i>DFR</i> | ACAATGTTACGCTACTGTTC         | forward     |
| 0098                | <i>DFR</i> | GTAGGAACATAGTACTCTGG         | reverse     |

<sup>1</sup> n.a., not applicable

**Supplemental Table 8:** Primers used to generate 35S:*PH3* and 35S:*TTG2*.

| primer | gene        | Sequence <sup>1</sup>              | orientation | restriction enzyme used |
|--------|-------------|------------------------------------|-------------|-------------------------|
| 2254   | <i>PH4</i>  | GCTCTAGAAATGGAGGTCAATGAAGCAGCGA    | forward     | BamHI                   |
| 1295   | <i>PH3</i>  | TAGGATCCCGTCAATCGACTATGATTTGTC     | reverse     | XbaI                    |
| 2224   | <i>TTG2</i> | GCTCTAGAAATGGAGGTGAATGATGGTGAAAGAG | forward     | BamHI                   |
| 1391   | <i>TTG2</i> | GCGGATCCCAAATTGTTTGCTTAGAAAGTTG    | reverse     | XbaI                    |

<sup>1</sup> Magenta letters indicate restriction sites that were introduced to facilitate ligation of PCR fragments in pGreen1H

**Supplemental Table 9:** Primer number and sequence used for yeast 2-hybrid cloning

| primer | gene            | Sequence <sup>1</sup>              | orientation | restriction enzyme used |
|--------|-----------------|------------------------------------|-------------|-------------------------|
| 3421   | <i>PH3</i>      | GGGAATTCATGGAGGTCAATGAAGCAGCGAA    | forward     | EcoRI                   |
| 3422   | <i>PH3</i>      | CCGCTCGAGCTATGATTTGTCTTTCATAGCTGA  | reverse     | XhoI                    |
| 3660   | <i>TTG2</i>     | CGGAATTCATGGAGGTGAATGATGGTGAAAG    | forward     | EcoRI                   |
| 3661   | <i>TTG2</i>     | CCGCTCGAGTCAAATTGTTTGCTTAGAAAAGTTG | reverse     | XhoI                    |
| 0296   | <i>AN11</i>     | TCGAATTCATGGAAAATTCAAGTCAAGAAATC   | forward     | EcoRI                   |
| 0297   | <i>AN11</i>     | TCCTCGAGCTTATACTTTAAGCAATTGCA      | reverse     | XhoI                    |
| 3658   | <i>TTG1</i>     | CGGAATTCATGGATAATTCAGCTCCAGATTCG   | forward     | EcoRI                   |
| 3659   | <i>TTG1</i>     | CCGCTCGAGTCAAACCTAAGGAGCTGCAT      | reverse     | XhoI                    |
| 0282   | <i>AN1full</i>  | AAGAATTCATGCAGCTGCAAACCATG         | forward     | EcoRI                   |
| 0283   | <i>AN1full</i>  | ATCTCGAGGGACAAAGTGAGAGATC          | reverse     | XhoI                    |
| 0451   | <i>AN1N'</i>    | TTTCTCGAGGCTCTTCTTGTG              | reverse     | XhoI                    |
| 0294   | <i>JAF13 N'</i> | CTCTCGAGCTTGTAATCTCCTTTCAAG        | forward     | MunI                    |
| 0325   | <i>JAF13 N'</i> | GGCAATTCATGGCTATGGGATGCAAAG        | reverse     | XhoI                    |
| 1136   | <i>PH4</i>      | GGCAATTCATGAGAACCCCATCATCATC       | forward     | MunI                    |
| 1139   | <i>PH4</i>      | GGCTCGAGCTCTAACTGGGATTATATTGATC    | reverse     | XhoI                    |

<sup>1</sup> Magenta letters indicate restriction sites that were introduced to facilitate ligation of PCR fragments in GAL4<sup>AD</sup> and GAL4<sup>BD</sup> yeast vectors



**Supplemental Data. Verweij et al. Plant Cell (2016) 10.1105/tpc 115.00608**

**Supplemental Table 10:** Primer number and sequence used for GFP and split-YFP constructs

| primer | gene        | sequence <sup>1</sup>                               | orientation |
|--------|-------------|-----------------------------------------------------|-------------|
| 6033   | <i>PH3</i>  | GGGGACAAGTTTGTACAAAAAAGCAGGCTTGATGGAGGTCAATGAAGCAG  | forward     |
| 6034   | <i>PH3</i>  | GGGGACCACTTTGTACAAGAAAGCTGGGTTCCTTCTGAGCACGTCAATCGA | reverse     |
| 6142   | <i>TTG2</i> | GGGGACAAGTTTGTACAAAAAAGCAGGCTTAATGGAGGTGAATGATGGTG  | forward     |
| 6143   | <i>TTG2</i> | GGGGACCACTTTGTACAAGAAAGCTGGGTTCGAGTCAAATTGTTTGCTTAG | reverse     |
| 3558   | <i>AN11</i> | CACCATGGAAAATTCAAGTCAAGAATCAC                       | forward     |
| 3559   | <i>AN11</i> | TACTTTAAGCAATTGCAACTTGTTAGAA                        | reverse     |
| 6140   | <i>TTG1</i> | GGGGACAAGTTTGTACAAAAAAGCAGGCTCCATGGATAATTCAGCTCCAG  | forward     |
| 6141   | <i>TTG1</i> | GGGGACCACTTTGTACAAGAAAGCTGGGTAAACTCTAAGGAGCTGCATTT  | reverse     |
| 4274   | <i>AN1</i>  | TACCCATGGTAATGCAGCTGCAAACCATGTTACGG                 | forward     |
| 4275   | <i>AN1</i>  | GATGAATTCAACTCTAGGGATTAAGTGGTG                      | reverse     |

<sup>1</sup> 5' extensions added to facilitate cloning/recombination using the Gateway cloning system, directional TOPO cloning, or conventional restriction-ligation are indicated in blue, green and magenta respectively
